# Supplementary material
Source: PubMed Central journal article supplement (PMC6679935)
Supplement: NIHMS1040849-supplement-Supplemental_Information.pdf [file NIHMS1040849-supplement-Supplemental_Information.pdf]

**Molecular Cell, Volume 71**

**Supplemental Information**

**Kinetic Basis for DNA Target**

**Specificity of CRISPR-Cas12a**

**Isabel Strohkendl, Fatema A. Saifuddin, James R. Rybarski, Ilya J. Finkelstein, and Rick Russell**

## **Kinetic basis for DNA target specificity of CRISPR-Cas12a**

Isabel Strohkendl, Fatema A. Saifuddin, James R. Rybarski, Ilya J. Finkelstein, and Rick Russell

### **Supplemental Information**

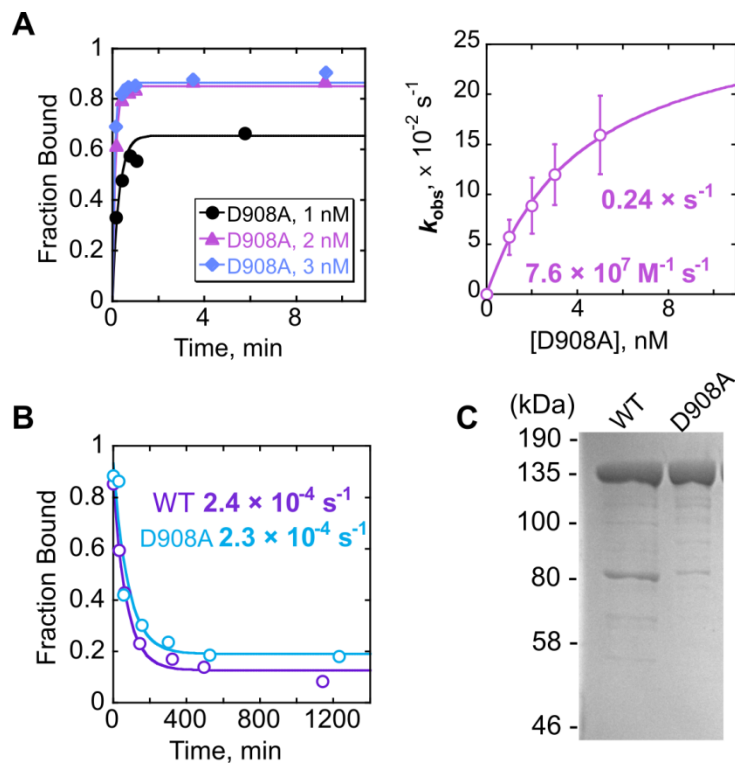

**Figure S1. Comparison of Cas12a and Cas12a(D908A) (Related to Figure 1)**

(A) Left: representative time courses of Cas12a(D908A) binding to the matched DNA target. Right: hyperbolic fit used to determine the second-order rate constant for binding and the first-order rate constant for R-loop propagation. Error bars represent the SEM of three replicates. The data gave a  $k_{on}$  value of  $7.6 (\pm 1.3) \times 10^7 \text{ M}^{-1} \text{ s}^{-1}$  and a  $k_{max}$  value of  $0.24 \pm 0.06 \text{ s}^{-1}$ .

(B) Comparison of the dissociation time courses of Cas12a (purple) and Cas12a(D908A) (blue) when  $\text{Mg}^{2+}$  is chelated by EDTA. The data gave  $k_{off}$  values of  $2.4 (\pm 0.3)$  and  $2.3 (\pm 0.3) \times 10^{-4} \text{ s}^{-1}$  for Cas12a and Cas12a(D908A), respectively. The  $k_{off}$  values are given as the mean  $\pm$  SEM.

(C) Gel image of wild-type Cas12a (WT) and Cas12a(D908A) after purification by affinity and size exclusion chromatography.

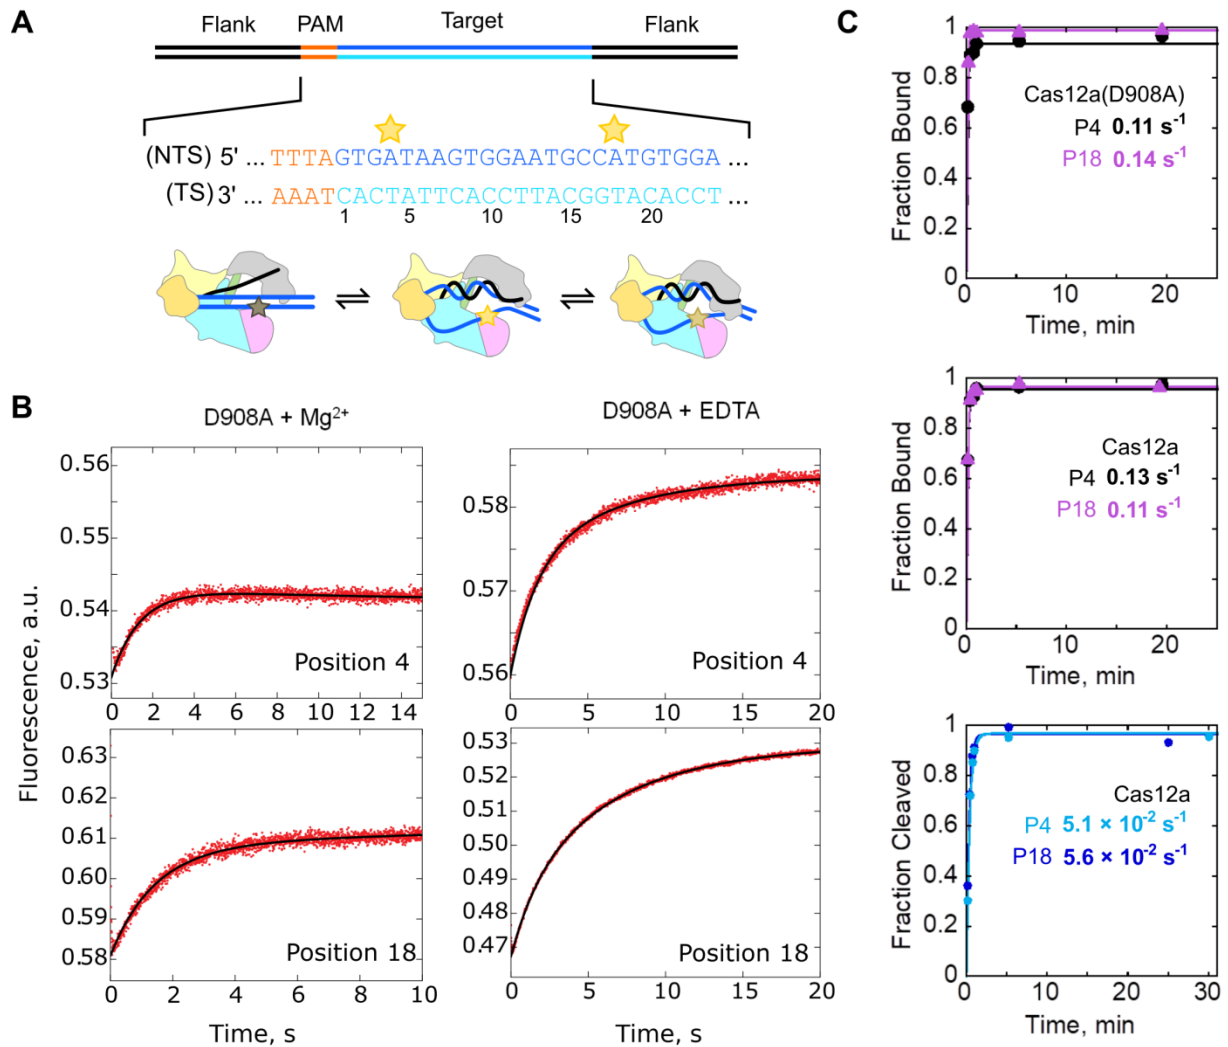

**Figure S2. Time courses of Cas12a(D908A) R-loop propagation monitored by 2-aminopurine (2-AP) fluorescence (Related to Figure 1)**

(A) Schematic of constructs and 2-AP fluorescence changes. Upon formation of the R-loop, the NTS, carrying the 2-AP base (at the PAM-distal position in the reaction cartoon), is displaced by the crRNA, giving an increase in 2-AP fluorescence. A rapid subsequent step, likely a conformational change within the complex, results in a small decrease in 2-AP fluorescence.

(B) Time-dependent changes in 2-AP fluorescence upon DNA binding. Data from all 2-AP fluorescence experiments were best fit by a double exponential equation, indicating the presence of two steps. The model that gave the best global fit to the data includes a first slow step, resulting in a substantial increase in 2-AP fluorescence, followed by a faster step that results in a modest decrease in fluorescence. We infer that the slower step is R-loop formation because of the correspondence with the maximal rate constant determined in binding assays and because unwinding of the DNA helix and exclusion of the NTS during R-loop formation would be expected to increase 2-AP fluorescence. Although the second step decreases the fluorescence value, the time dependences do not display a phase in which the total

fluorescence decreases, instead giving a biphasic curve that increases in value over time. This is because the intermediate with high fluorescence does not accumulate substantially due to its rapid conformational change to the final state. Thus, at any given time, the total fluorescence increase caused by R-loop formation is greater than the decrease caused by the faster conformational change. The rate constants for these transitions were not strongly affected by the presence of 5 mM MgCl<sub>2</sub> and were the same within error regardless of the position of the 2-AP. For Cas12a(D908A) with Mg<sup>2+</sup>,  $k_{R-loop} = 0.15 \pm 0.01 \text{ s}^{-1}$  (left). For Cas12a(D908A) without free Mg<sup>2+</sup> (+EDTA),  $k_{R-loop} = 0.151 \pm 0.003 \text{ s}^{-1}$  (right). The values of the rate constant for the faster transition were  $0.71 \pm 0.04 \text{ s}^{-1}$  and  $0.49 \pm 0.03 \text{ s}^{-1}$  in the presence and absence of Mg<sup>2+</sup>, respectively. Values reflect the fit-derived rate  $\pm$  SE.

(C) Gel-shift assays and cleavage assays of 2-AP-containing target DNAs. Shown are representative time courses of binding by Cas12a(D908A) (top panel) and Cas12a (middle panel) and cleavage by Cas12a (bottom panel). The rates of binding and cleavage with 10 nM enzyme and 5 mM MgCl<sub>2</sub> were unaffected by the presence of the 2-AP base at either position 4 (P4) or 18 (P18). For Cas12a(D908A), observed rate constants were  $0.11 \pm 0.01 \text{ s}^{-1}$  and  $0.14 \pm 0.02 \text{ s}^{-1}$  with 2-AP at position 4 and 18, respectively. For wild-type Cas12a, the corresponding rate constants were  $0.13 \pm 0.01 \text{ s}^{-1}$  and  $0.11 \pm 0.01 \text{ s}^{-1}$ , respectively. Observed rate constants for cleavage of the non-target strand ( $k_{obs}^{NTS}$ ) were  $5.1 (\pm 0.7) \times 10^{-2} \text{ s}^{-1}$  and  $5.6 (\pm 0.3) \times 10^{-2} \text{ s}^{-1}$  with 2-AP at position 4 and 18, respectively.

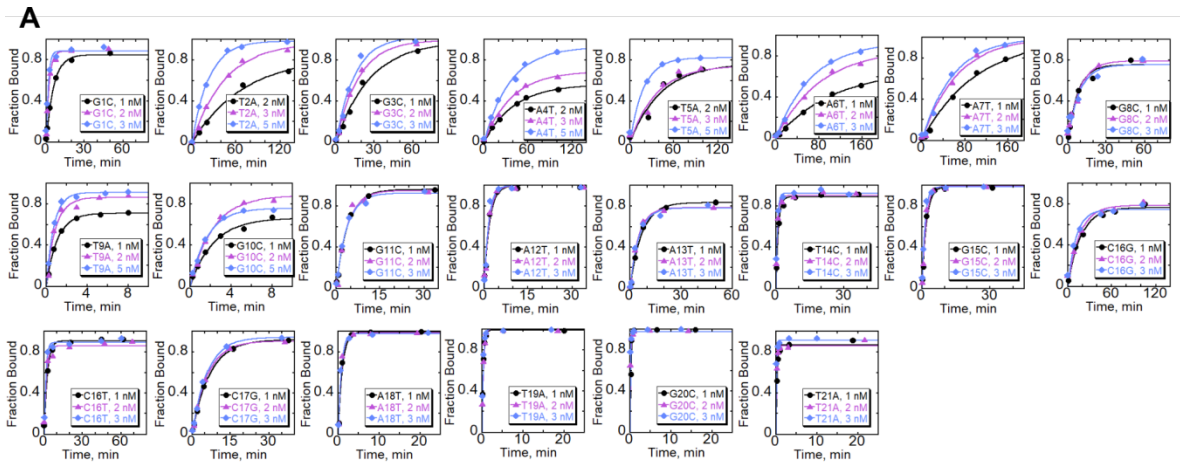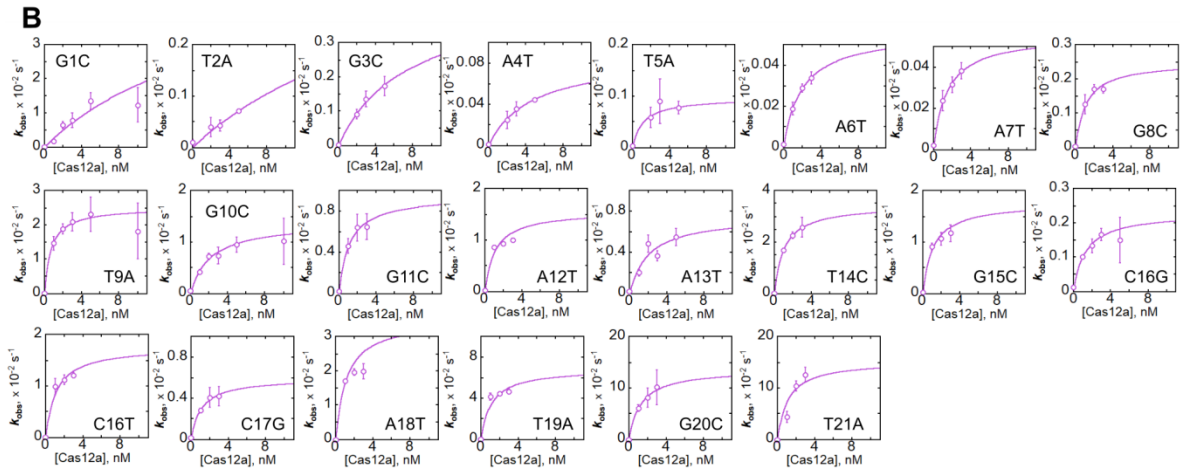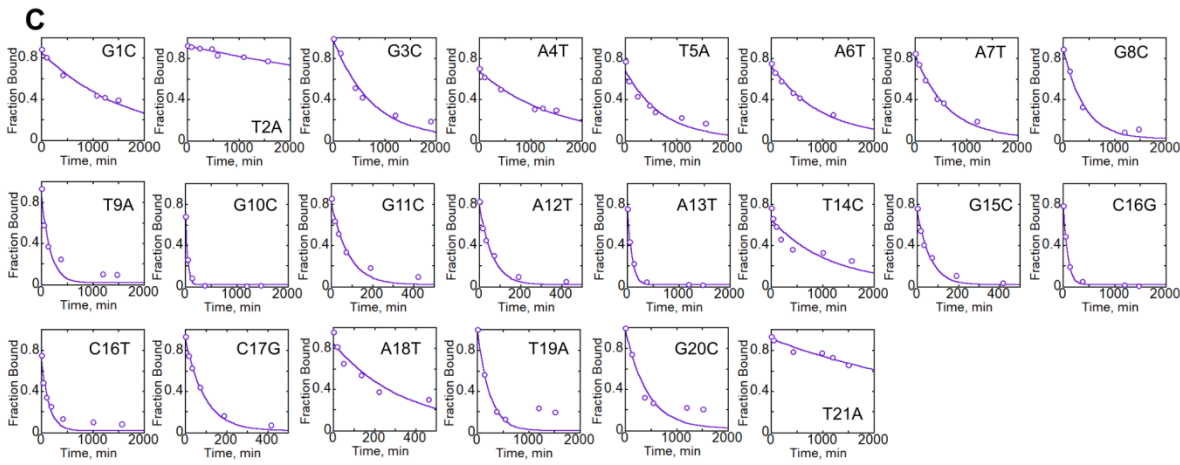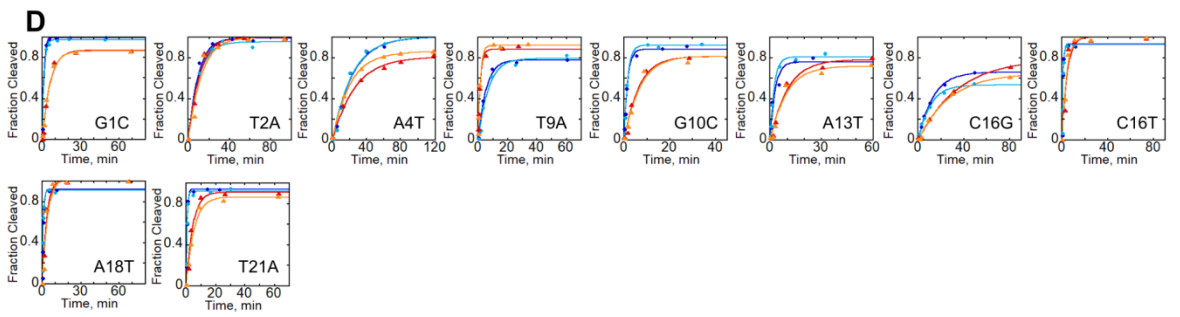

**Figure S3. Time courses and concentration dependences of Cas12a binding and cleavage of DNA targets with single mismatches (Related to Figure 3 and Figure 4)**

(A) Representative time courses of binding reactions at multiple Cas12a concentrations.

(B) Observed rate constant for binding as a function of Cas12a concentration. These plots were used to derive the second-order rate constant for binding ( $k_{on}$ ) and maximal rate constant for R-loop propagation ( $k_{R-loop}$ ) from the fit of a hyperbolic function. Error bars represent the SEM of at least three replicates.

(C) Representative time courses of Cas12a(D908A) complex dissociation. Dissociation time courses were fit to a single exponential to determine the rate constant. We note that the time dependences of PAM-distal mismatches appear to include a second phase, perhaps reflecting a sub-population in which the R-loop is incompletely formed. Further work will be required to dissect this behavior, but its presence does not affect the conclusions from the current work.

(D) Representative time courses of cleavage for both DNA strands of a subset of mismatch targets with saturating concentrations of Cas12a: NTS at 10 nM Cas12a (blue), NTS at 50 nM Cas12a (cyan), TS at 10 nM Cas12a (red), and TS at 50 nM Cas12a (orange).

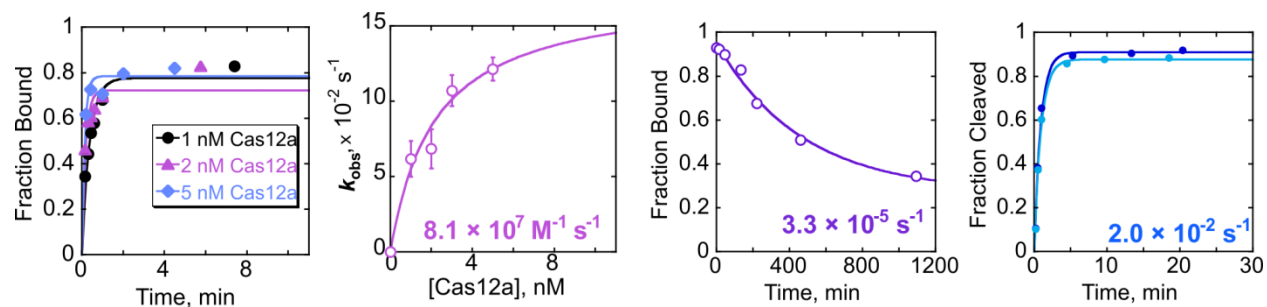

**Figure S4. Cas12a interactions and cleavage of a matched target with a physiological  $\text{Mg}^{2+}$  concentration (Related to Figure 1)**

Graphs from left to right depict the same type of experiments as shown in Figure S3 A-D, respectively, but represent experiments performed using 1 mM  $\text{MgCl}_2$ . Error bars in the plot of observed binding rate constant versus Cas12a concentration represent the SEM of at least three replicates. Wild-type Cas12a bound matched target DNA with a  $k_{\text{on}}$  value of  $8.1 (\pm 1.2) \times 10^7 \text{ M}^{-1} \text{ s}^{-1}$  and cleaved the NTS with a  $k_{\text{c}}^{\text{NTS}}$  value of  $2.0 (\pm 0.1) \times 10^{-2} \text{ s}^{-1}$ . Cas12a(D908A) dissociated from matched target DNA with a  $k_{\text{off}}$  value of  $3.3 (\pm 0.6) \times 10^{-5} \text{ s}^{-1}$ . In the plot at the right, NTS cleavage is measured with 10 nM (blue) or 50 nM (cyan) Cas12a. The value of  $k_{\text{off}}$  represents the mean  $\pm$  SEM of three independent determinations. The values of  $k_{\text{on}}$  and  $k_{\text{c}}$  represent the best fit  $\pm$  SE.



| DNA Target Oligo | Sequence (5' to 3')                                         |
|------------------|-------------------------------------------------------------|
| PT NTS           | ACGCTCTTCCGATCTTTTAGTGATAAGTGAATGCCATGTGGAGATCGGAAGAGCAC    |
| G1C NTS          | ACGCTCTTCCGATCTTTTACTGATAAGTGAATGCCATGTGGAGATCGGAAGAGCAC    |
| T2A NTS          | CGCTCTTCCGATCTTTTAGAGATAAGTGAATGCCATGTGGAGCTACTGTGCTGCT     |
| G3C NTS          | CGCTCTTCCGATCTTTTAGTCATAAGTGAATGCCATGTGGAGTAGCTACTGTGCT     |
| A4T NTS          | CGCTCTTCCGATCTTTTAGTGTAAAGTGAATGCCATGTGGAGCTACTGTGCTGCT     |
| T5A NTS          | ACGCTCTTCCGATCTTTTAGTGAAAAGTGAATGCCATGTGGAGATCGGAAGAGCAC    |
| A6T NTS          | CGCTCTTCCGATCTTTTAGTGATTAGTGAATGCCATGTGGAGTAGCTACTGTGCT     |
| A7T NTS          | CGCTCTTCCGATCTTTTAGTGATATGTGAATGCCATGTGGAGTAGCTACTGTGCT     |
| G8C NTS          | CGCTCTTCCGATCTTTTAGTGATAACTGGAATGCCATGTGGAGTAGCTACTGTGCT    |
| T9A NTS          | ACGCTCTTCCGATCTTTTAGTGATAAGAGGAATGCCATGTGGAGATCGGAAGAGCAC   |
| G10C NTS         | ACGCTCTTCCGATCTTTTAGTGATAAGTGAATGCCATGTGGAGATCGGAAGAGCAC    |
| G11C NTS         | CGCTCTTCCGATCTTTTAGTGATAAGTGCAATGCCATGTGGAGTAGCTACTGTGCT    |
| A12T NTS         | CGCTCTTCCGATCTTTTAGTGATAAGTGGTATGCCATGTGGAGTAGCTACTGTGCT    |
| A13T NTS         | ACGCTCTTCCGATCTTTTAGTGATAAGTGGATTGCCATGTGGAGATCGGAAGAGCAC   |
| T14C NTS         | CGCTCTTCCGATCTTTTAGTGATAAGTGAACGCCATGTGGAGTAGCTACTGTGCT     |
| G15C NTS         | CGCTCTTCCGATCTTTTAGTGATAAGTGAATCCCATGTGGAGTAGCTACTGTGCT     |
| C16G NTS         | ACGCTCTTCCGATCTTTTAGTGATAAGTGAATGGCATGTGGAGATCGGAAGAGCAC    |
| C16T NTS         | ACGCTCTTCCGATCTTTTAGTGATAAGTGAATGTCATGTGGAGATCGGAAGAGCAC    |
| C17G NTS         | CGCTCTTCCGATCTTTTAGTGATAAGTGAATGCGATGTGGAGTAGCTACTGTGCT     |
| A18T NTS         | CGCTCTTCCGATCTTTTAGTGATAAGTGAATGCCTGTGGAGTAGCTACTGTGCT      |
| T19A NTS         | CGCTCTTCCGATCTTTTAGTGATAAGTGAATGCCAAGTGGAGTAGCTACTGTGCT     |
| G20C NTS         | CGCTCTTCCGATCTTTTAGTGATAAGTGAATGCCATCTGGAGTAGCTACTGTGCT     |
| T21A NTS         | ACGCTCTTCCGATCTTTTAGTGATAAGTGAATGCCATGAGGAGATCGGAAGAGCAC    |
| PT TS            | GTGCTCTTCCGATCTCCACATGGCATTCCACTTATCACTAAAAGATCGGAAGAGCGT   |
| G1C TS           | GTGCTCTTCCGATCTCCACATGGCATTCCACTTATCAGTAAAAGATCGGAAGAGCGT   |
| T2A TS           | AGCACAGTAGCTACTCCACATGGCATTCCACTTATCTCTAAAAGATCGGAAGAGCG    |
| G3C TS           | AGCACAGTAGCTACTCCACATGGCATTCCACTTATGACTAAAAGATCGGAAGAGCG    |
| A4T TS           | AGCACAGTAGCTACTCCACATGGCATTCCACTTAACTAAAAGATCGGAAGAGCG      |
| T5A TS           | GTGCTCTTCCGATCTCCACATGGCATTCCACTTTTCACTAAAAGATCGGAAGAGCGT   |
| A6T TS           | AGCACAGTAGCTACTCCACATGGCATTCCACTAATCACTAAAAGATCGGAAGAGCG    |
| A7T TS           | AGCACAGTAGCTACTCCACATGGCATTCCACATCACTAAAAGATCGGAAGAGCG      |
| G8C TS           | AGCACAGTAGCTACTCCACATGGCATTCCAGTTATCACTAAAAGATCGGAAGAGCG    |
| T9A TS           | GTGCTCTTCCGATCTCCACATGGCATTCCCTTATCACTAAAAGATCGGAAGAGCGT    |
| G10C TS          | GTGCTCTTCCGATCTCCACATGGCATTCCGACTTATCACTAAAAGATCGGAAGAGCGT  |
| G11C TS          | AGCACAGTAGCTACTCCACATGGCATTGCACTTATCACTAAAAGATCGGAAGAGCG    |
| A12T TS          | AGCACAGTAGCTACTCCACATGGCATTACACTTATCACTAAAAGATCGGAAGAGCG    |
| A13T TS          | GTGCTCTTCCGATCTCCACATGGCAATCCACTTATCACTAAAAGATCGGAAGAGCGT   |
| T14C TS          | AGCACAGTAGCTACTCCACATGGCGTTCCACTTATCACTAAAAGATCGGAAGAGCG    |
| G15C TS          | AGCACAGTAGCTACTCCACATGGGATTCCACTTATCACTAAAAGATCGGAAGAGCG    |
| C16G TS          | GTGCTCTTCCGATCTCCACATGGCATTCCACTTATCACTAAAAGATCGGAAGAGCGT   |
| C16T TS          | GTGCTCTTCCGATCTCCACATGACATTCCACTTATCACTAAAAGATCGGAAGAGCGT   |
| C17G TS          | AGCACAGTAGCTACTCCACATGCGATTCCACTTATCACTAAAAGATCGGAAGAGCG    |
| A18T TS          | AGCACAGTAGCTACTCCACAAGGCATTCCACTTATCACTAAAAGATCGGAAGAGCG    |
| T19A TS          | AGCACAGTAGCTACTCCACTTGGCATTCCACTTATCACTAAAAGATCGGAAGAGCG    |
| G20C TS          | AGCACAGTAGCTACTCCAGATGGCATTCCACTTATCACTAAAAGATCGGAAGAGCG    |
| T21A TS          | GTGCTCTTCCGATCTCCTCATGGCATTCCACTTATCACTAAAAGATCGGAAGAGCGT   |
| 2-AP PT P4       | CGCTCTTCCGATCTTTTAGTG-2AP-TAAGTGAATGCCATGTGGAGATCGGAAGAGCAC |
| 2-AP PT P18      | CGCTCTTCCGATCTTTTAGTGATAAGTGAATGCC-2AP-TGTGGAGATCGGAAGAGCAC |

**Table S1. Table of oligonucleotide sequences. (Related to Figure 3 and Figure 4)**

Target DNA substrates were constructed from two fully-complementary oligonucleotides representing the non-target strand (NTS) and target strand (TS). Mismatched sequences were created by inverting the nucleotides of the NTS and TS, except at position 14 where this substitution would have created an undesired PAM.

| DNA Substrate | $k_{\text{on}}$ ( $\times 10^7 \text{ M}^{-1} \text{ s}^{-1}$ ) | $k_{\text{max}}$ ( $\times 10^{-2} \text{ s}^{-1}$ ) | $k_{\text{off}}$ ( $\times 10^{-4} \text{ s}^{-1}$ ) | $k_{\text{obs}}^{\text{NTS}}$ ( $\times 10^{-2} \text{ s}^{-1}$ ) | $k_{\text{obs}}^{\text{TS}}$ ( $\times 10^{-2} \text{ s}^{-1}$ ) |
|---------------|-----------------------------------------------------------------|------------------------------------------------------|------------------------------------------------------|-------------------------------------------------------------------|------------------------------------------------------------------|
| PT            | 11 ± 1                                                          | 13 ± 1                                               | 0.059 ± 0.004                                        | 5.2 ± 0.6                                                         | 0.51 ± 0.02                                                      |
| G1C           | 0.32 ± 0.03                                                     | 2.6 ± 0.3                                            | 0.101 ± 0.002                                        | 1.7 ± 0.2                                                         | 0.33 ± 0.02                                                      |
| T2A           | 0.028 ± 0.002                                                   | 0.14 ± 0.01                                          | 0.018 ± 0.000                                        | 0.16 ± 0.02                                                       | 0.23 ± 0.02                                                      |
| G3C           | 0.059 ± 0.006                                                   | 0.45 ± 0.37                                          | 0.22 ± 0.01                                          | N.D.                                                              | N.D.                                                             |
| A4T           | 0.019 ± 0.003                                                   | 0.08 ± 0.04                                          | 0.14 ± 0.02                                          | 0.069 ± 0.004                                                     | 0.090 ± 0.009                                                    |
| T5A           | 0.082 ± 0.024                                                   | 0.097 ± 0.046                                        | 0.28 ± 0.02                                          | N.D.                                                              | N.D.                                                             |
| A6T           | 0.030 ± 0.002                                                   | 0.056 ± 0.018                                        | 0.16 ± 0.01                                          | N.D.                                                              | N.D.                                                             |
| A7T           | 0.040 ± 0.005                                                   | 0.056 ± 0.019                                        | 0.22 ± 0.03                                          | N.D.                                                              | N.D.                                                             |
| G8C           | 0.22 ± 0.02                                                     | 0.25 ± 0.01                                          | 0.36 ± 0.06                                          | N.D.                                                              | N.D.                                                             |
| T9A           | 2.6 ± 0.2                                                       | 2.9 ± 0.2                                            | 1.1 ± 0.2                                            | 1.8 ± 0.2                                                         | 0.42 ± 0.05                                                      |
| G10C          | 0.64 ± 0.05                                                     | 1.4 ± 0.3                                            | 4.6 ± 0.6                                            | 1.1 ± 0.1                                                         | 0.22 ± 0.01                                                      |
| G11C          | 0.78 ± 0.10                                                     | 0.95 ± 0.10                                          | 2.2 ± 0.3                                            | N.D.                                                              | N.D.                                                             |
| A12T          | 1.43 ± 0.04                                                     | 1.57 ± 0.03                                          | 2.3 ± 0.4                                            | N.D.                                                              | N.D.                                                             |
| A13T          | 0.28 ± 0.04                                                     | 0.82 ± 0.26                                          | 2.4 ± 0.2                                            | 0.81 ± 0.22                                                       | 0.23 ± 0.02                                                      |
| T14C          | 3.18 ± 0.03                                                     | 3.53 ± 0.04                                          | 0.16 ± 0.02                                          | N.D.                                                              | N.D.                                                             |
| G15C          | 1.6 ± 0.1                                                       | 1.3 ± 0.3                                            | 2.9 ± 0.2                                            | N.D.                                                              | N.D.                                                             |
| C16G          | 0.18 ± 0.01                                                     | 0.23 ± 0.05                                          | 1.5 ± 0.3                                            | 0.26 ± 0.05                                                       | 0.072 ± 0.006                                                    |
| C16T          | 1.5 ± 0.1                                                       | 1.7 ± 0.1                                            | 0.89 ± 0.26                                          | 2.7 ± 0.4                                                         | 0.31 ± 0.05                                                      |
| C17G          | 0.55 ± 0.03                                                     | 0.60 ± 0.03                                          | 1.86 ± 0.04                                          | N.D.                                                              | N.D.                                                             |
| A18T          | 3.2 ± 0.1                                                       | 3.5 ± 0.1                                            | 1.1 ± 0.3                                            | 2.3 ± 0.6                                                         | 0.57 ± 0.07                                                      |
| T19A          | 6.3 ± 0.1                                                       | 6.9 ± 0.1                                            | 0.70 ± 0.04                                          | N.D.                                                              | N.D.                                                             |
| G20C          | 11 ± 1                                                          | 14 ± 8                                               | 0.47 ± 0.03                                          | N.D.                                                              | N.D.                                                             |
| T21A          | 11 ± 1                                                          | 15 ± 1                                               | 0.032 ± 0.001                                        | 3.0 ± 0.1                                                         | 0.43 ± 0.01                                                      |

**Table S2. Table of measured rates for matched and all mismatched targets. (Related to Figure 3 and Figure 4)**

All rates were measured in the presence of 5 mM MgCl<sub>2</sub>. Values of  $k_{\text{off}}$  represent the mean ± SEM. Values of  $k_{\text{on}}$ ,  $k_{\text{max}}$  (representing the R-loop formation rate), and observed rate constants for strand cleavage ( $k_{\text{obs}}^{\text{NTS}}$  and  $k_{\text{obs}}^{\text{TS}}$ ) represent the fit parameter ± SE. At least three reaction replicates were performed for each Cas12a concentration and used to perform a weighted hyperbolic fit. PT, matched (perfect) target. N.D., not determined.
